# Supplementary material for: Layered porous Mn0.18V2O5@C with manganese and carbon provided by a metal–organic framework precursor as a cathode material for aqueous zinc-ion batteries
Source: Royal Society of Chemistry journal article supplement (doi:10.1039/d3dt02152a), 2023-01-01
Supplement: d3dt02152a1.pdf [file d3dt02152a1.pdf]

## Supporting information

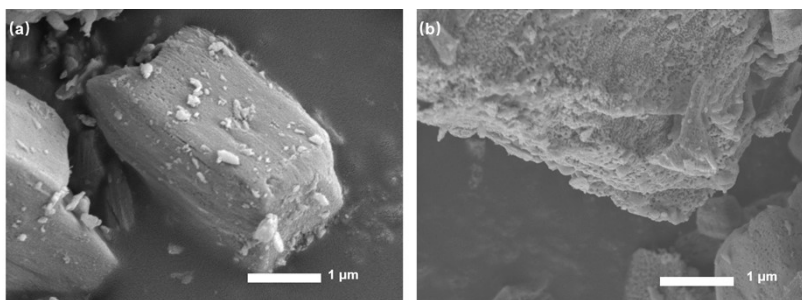

**Fig. S1** (a) Intermediate products of Mn-BDC and  $\text{NH}_4\text{VO}_3$  annealed at  $200^\circ\text{C}$ . (b) SEM image of MVO@C.

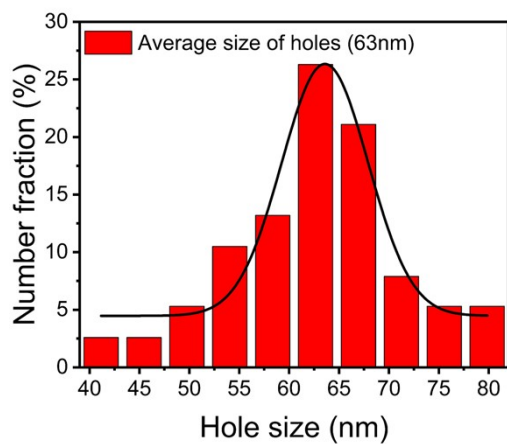

**Fig. S2** Pore size distribution on MVO@C layered nanoplates.

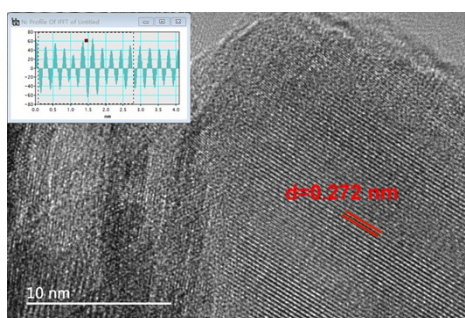

**Fig. S3** The HRTEM image of MVO@C.

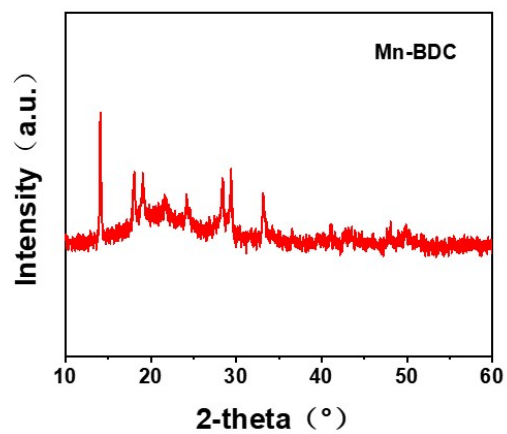

Fig. S4 The XRD pattern of Mn-BDC.

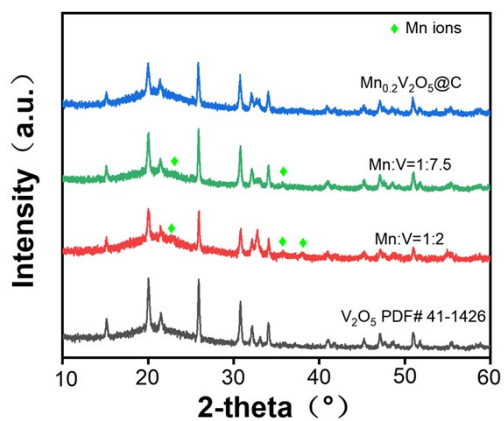

Fig. S5 XRD patterns of MVO@C cathode at different V and Mn ratios.

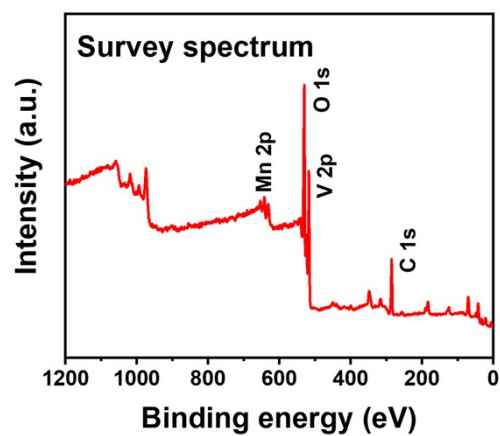

Fig. S6 Total XPS spectrum of MVO@C.

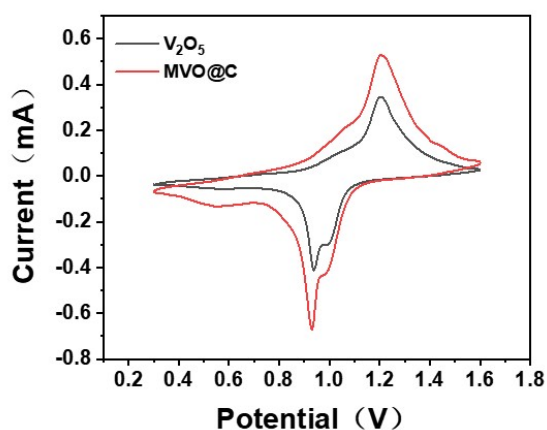

Fig. S7 CV comparison of MVO@C and  $V_2O_5$  at  $0.1 \text{ mV s}^{-1}$  scan rate.

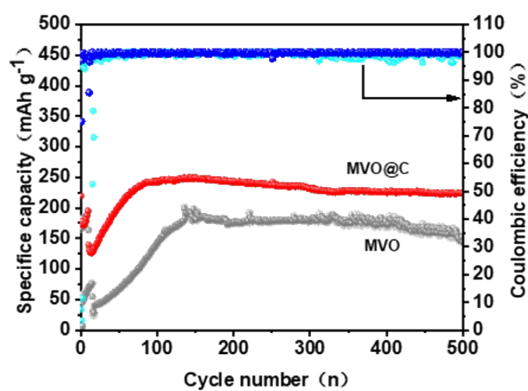

Fig. S8 Cycle performance of MVO@C and MVO at  $4 \text{ A g}^{-1}$ .

**Table S1.**  $R_s$  ( $\Omega$ ) and  $R_{ct}$  ( $\Omega$ ) values on electrochemical impedance spectroscopy of MVO@C.

| Cycle number | MVO@C $R_s$ ( $\Omega$ ) | MVO@C $R_{ct}$ ( $\Omega$ ) |
|--------------|--------------------------|-----------------------------|
| 0            | 4.962                    | 432.6                       |
| 50           | 2.651                    | 59.62                       |
| 250          | 1.24                     | 13.9                        |

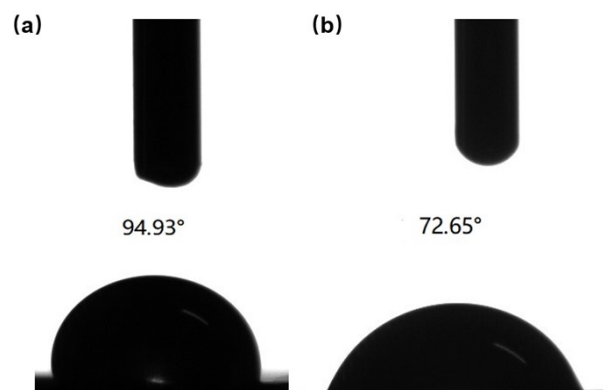

**Fig. S9** (a) Instantaneous contact angle of  $V_2O_5$  cathode, and (b) Instantaneous contact angle of MVO@C cathode.

**Table S2** Electrode performances of reported vanadium-based materials in AZIBs.

| Cathode                 | Electrolyte          | Maximum capacity                     | Cycle performance                                     | Ref. |
|-------------------------|----------------------|--------------------------------------|-------------------------------------------------------|------|
| $MgxV_2O_5 \cdot nH_2O$ | 3 M $Zn(CF_3SO_3)_2$ | 350 mAh $g^{-1}$ at 0.1 A $g^{-1}$   | 90 mAh $g^{-1}$ at 5 A $g^{-1}$ after 2000 cycles.    | 1    |
| C@ $VO_2$               | 3 M $Zn(CF_3SO_3)_2$ | 376 mAh $g^{-1}$ at 0.05 A $g^{-1}$  | 160 mAh $g^{-1}$ at 5 A $g^{-1}$ after 2000 cycles    | 2    |
| @ $V_2O_5$              | 3 M $Zn(CF_3SO_3)_2$ | 328.8 mAh $g^{-1}$ at 0.2 A $g^{-1}$ | 173.5 mAh $g^{-1}$ at 2 A $g^{-1}$ after 500 cycles   | 3    |
| $Cu_{0.26}V_2O_5@C$     | 3 M $Zn(CF_3SO_3)_2$ | 306 mAh $g^{-1}$ at 0.1 A $g^{-1}$   | 210 mAh $g^{-1}$ at 0.1 A $g^{-1}$ after 100 cycles   | 4    |
| ZnVOH/rGO               | 3 M $Zn(CF_3SO_3)_2$ | 348 mAh $g^{-1}$ at 0.1 A $g^{-1}$   | ~80 mAh $g^{-1}$ at 5 A $g^{-1}$ after 2000 cycles    | 5    |
| a- $V_2O_5$             | 3 M $Zn(CF_3SO_3)_2$ | 322 mAh $g^{-1}$ at 0.1 A $g^{-1}$   | 80 mAh $g^{-1}$ at 2 A $g^{-1}$ after 2000 cycles     | 6    |
| P- $V_2O_5$             | 3 M $Zn(CF_3SO_3)_2$ | ~375 mAh $g^{-1}$ at 0.1 A $g^{-1}$  | 305 mAh $g^{-1}$ at 0.1 A $g^{-1}$ after 100 cycles   | 7    |
| $V_2O_5@Graphe$         | 3 M $Zn(CF_3SO_3)_2$ | 226 mAh $g^{-1}$ at 0.294 A $g^{-1}$ | 166 mAh $g^{-1}$ at 0.588 A $g^{-1}$ after 500 cycles | 8    |
| nanofiber               | 2 M $Zn(CF_3SO_3)_2$ | 200 mAh $g^{-1}$ at 0.2 A $g^{-1}$   | ~75 mAh $g^{-1}$ at 3 A $g^{-1}$ after 700 cycles     | 9    |
| $Ag_{0.33}V_2O_5$       | $Zn(CF_3SO_3)_2$     |                                      |                                                       |      |

|                          |                                       |                                                  |                                                |      |
|--------------------------|---------------------------------------|--------------------------------------------------|------------------------------------------------|------|
| $\text{Mn}_{0.18}$       | 3 M                                   |                                                  | 161 mAh g <sup>-1</sup> at 6 A g <sup>-1</sup> | This |
| $\text{V}_2\text{O}_5@C$ | $\text{Zn}(\text{CF}_3\text{SO}_3)_2$ | 380 mAh g <sup>-1</sup> at 0.1 A g <sup>-1</sup> | after 2000 cycles                              | work |

---

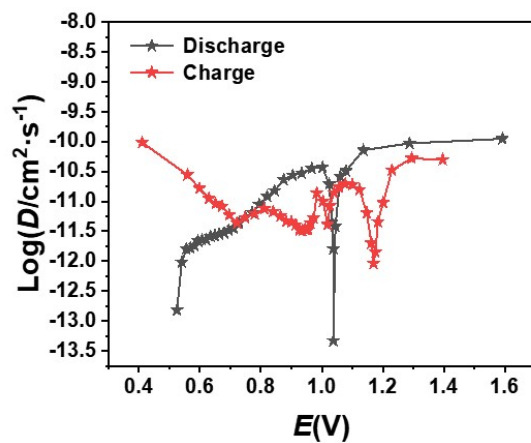

**Fig. S10** The GITT curves and the corresponding  $\text{Zn}^{2+}$  diffusion coefficient of the  $\text{V}_2\text{O}_5$  electrode.

## References:

1. F. Ming, H. Liang, Y. Lei, S. Kandambeth, M. Eddaoudi and H. N. Alshareef, *ACS Energy Letters*, 2018, **3**, 2602-2609.
2. Y. Tong, Y. Zhao, M. Luo, S. Su, Y. Yang, Y. Zang, X. Li, L. Wang and J. Fang, *Journal of Alloys and Compounds*, 2023, **932**, 167681.
3. X. Wang, B. Zhang, J. Feng, L. Wang, B. Wu, J. Zhang, X. Ou, F. Hou and J. Liang, *Sustainable Materials and Technologies*, 2020, **26**, e00236.
4. Y. Fan, X. Yu, Z. Feng, M. Hu and Y. Zhang, *Molecules*, 2022, **27**, 5387.
5. S. Wu, Y. Ding, L. Hu, X. Zhang, Y. Huang and S. Chen, *Materials Letters*, 2020, **277**, 128268.
6. Y. Ding, Y. Peng, W. Chen, Y. Niu, S. Wu, X. Zhang and L. Hu, *Applied Surface Science*, 2019, **493**, 368-374.
7. L. Gong, Y. Zhang and Z. Li, *Materials Today Chemistry*, 2022, **23**, 100731.
8. X. Chen, L. Wang, H. Li, F. Cheng and J. Chen, *Journal of Energy Chemistry*, 2019, **38**, 20-25.
9. B. Lan, Z. Peng, L. Chen, C. Tang, S. Dong, C. Chen, M. Zhou, C. Chen, Q. An and P. Luo, *Journal of Alloys and Compounds*, 2019, **787**, 9-16.
